# Supplementary material
Source: publisher figshare collection journal article supplement (https://tandf.figshare.com/ndownloader/files/18088688)
Supplement: Supplementary file 1 [file 18088688]

The parameter of MACEs between two groups for power calculating

| Parameter | Value |
| --- | --- |
| Alpha (significance level) | 0.05 |
| Total sample size | 1066 |
| Proportion in Group 1 | 0.6979 |
| Surviving Group 1 | 0.96200 |
| Surviving Group 2 | 0.97500 |
| Accrual time | 3 |
| Follow Up time  Beta | 1  0.64123 |
| Power | 0.35877 |

The parameter of Any BARC Bleeding between two groups for power calculating:

| Parameter | Value |
| --- | --- |
| Alpha (significance level) | 0.05 |
| Total sample size | 1066 |
| P0（Baseline Probability that Y=1） | 0.297 |
| Odds Ratio | 0.615 |
| R2 | 0.010 |
| Beta | 0.11855 |
| Power | 0.88145 |

The parameter of High BARC Bleeding between two groups for power calculating

| Parameter | Value |
| --- | --- |
| Alpha (significance level) | 0.05 |
| Total sample size | 1066 |
| P0（Baseline Probability that Y=1） | 0.015 |
| Odds Ratio | 0.326 |
| R2 | 0.003 |
| Beta | 0.58688 |
| Power | 0.41312 |

The parameter of Lower BARC Bleeding between two groups for power calculating:

| Parameter | Value |
| --- | --- |
| Alpha (significance level) | 0.05 |
| Total sample size | 1066 |
| P0（Baseline Probability that Y=1） | 0.282 |
| Odds Ratio | 0.648 |
| R2 | 0.008 |
| Beta | 0.20531 |
| Power | 0.79469 |
